# Supplementary material
Source: publisher figshare collection journal article supplement (https://acs.figshare.com/ndownloader/files/4092259)
Supplement: Supplementary file 1 [file 4092259]

## SUPPLEMENTARY INFORMATION

### Structural Models for Cu(II) Bound to the Fragment 92-96 of the Human Prion Protein

Rafael Grande-Aztatzi, Lina Rivillas-Acevedo, Liliana Quintanar, Alberto Vela

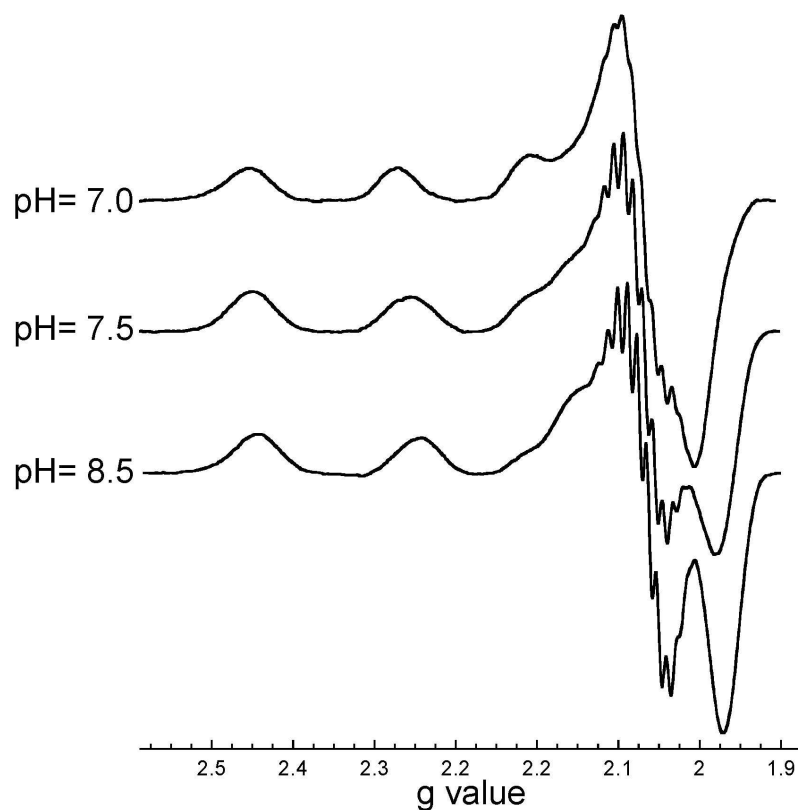

**Figure S1.** EPR spectra of the Cu(II) complexes formed with the PrP(92-115) at pH 8.5, 7.5 and 7.0. All spectra were collected as described in the experimental section at 150 K.

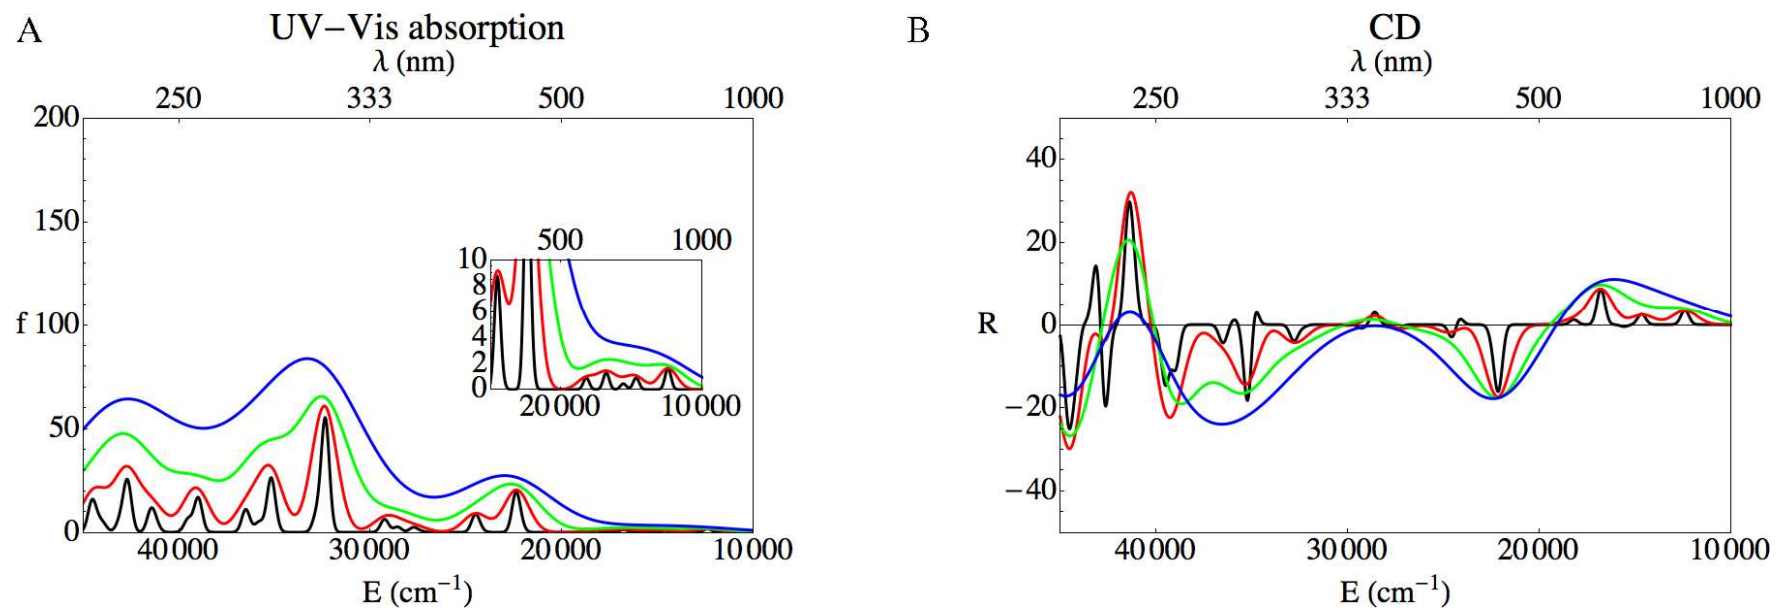

**Figure S2.** UV-Vis absorption (**A**) and CD (**B**) spectra of the Cu(II)-PrP(92-96) complex with a 2N2O coordination mode calculated with the PBE0 functional. The simulation was done with a FWHM of 500 (black line), 1500 (red line), 3000 (green line) and 5000  $\text{cm}^{-1}$  (blue line)

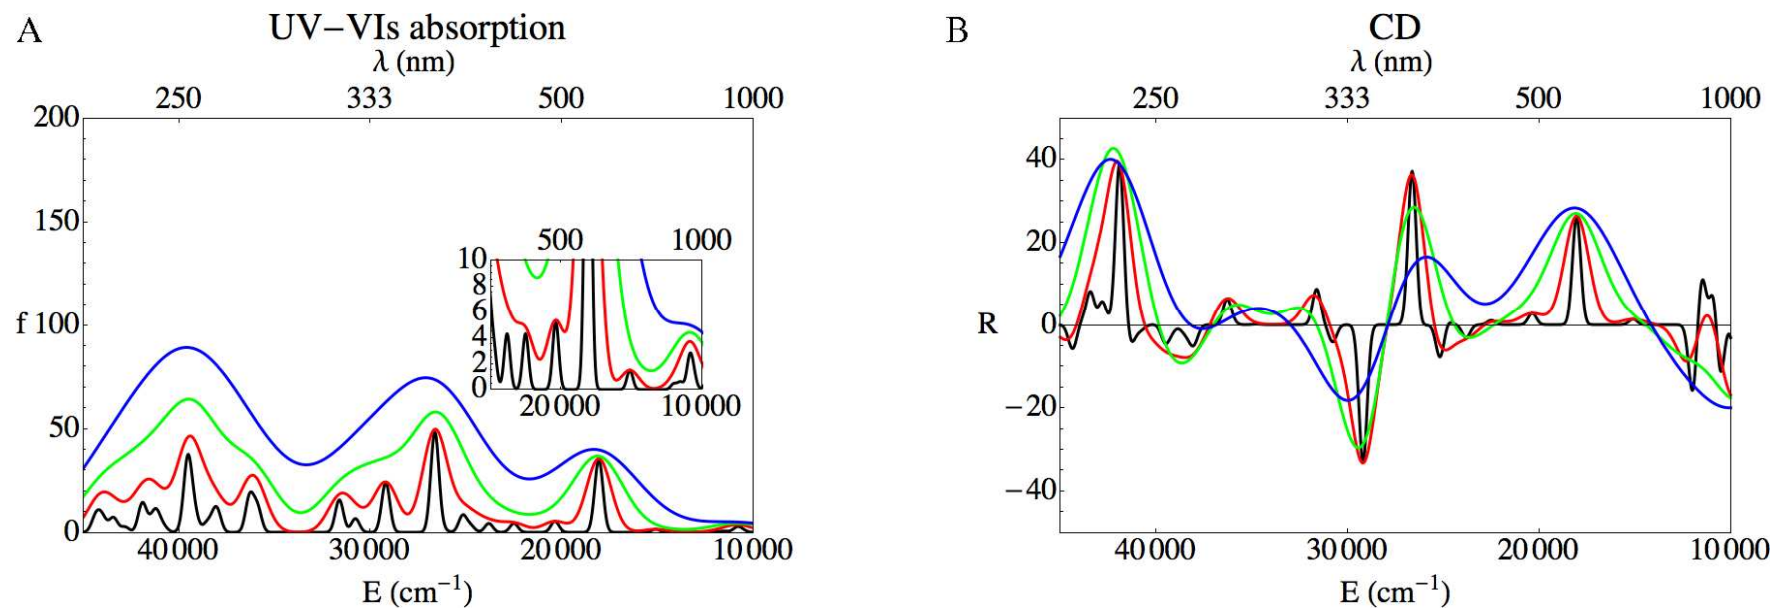

**Figure S3.** UV-Vis absorption and CD spectra of the Cu(II)-PrP(92-96) complex with a N3O coordination mode calculated with the PBE0 functional. The simulation was done with a FWHM of 500 (black line), 1500 (red line), 3000 (green line) and 5000 cm<sup>-1</sup> (blue line)
